# Supplementary material
Source: Springer Nature journal article supplement (https://www.springermedizin.de/resource/supplementary/12985_2010_1047_MOESM4_ESM.pdf/9609024)

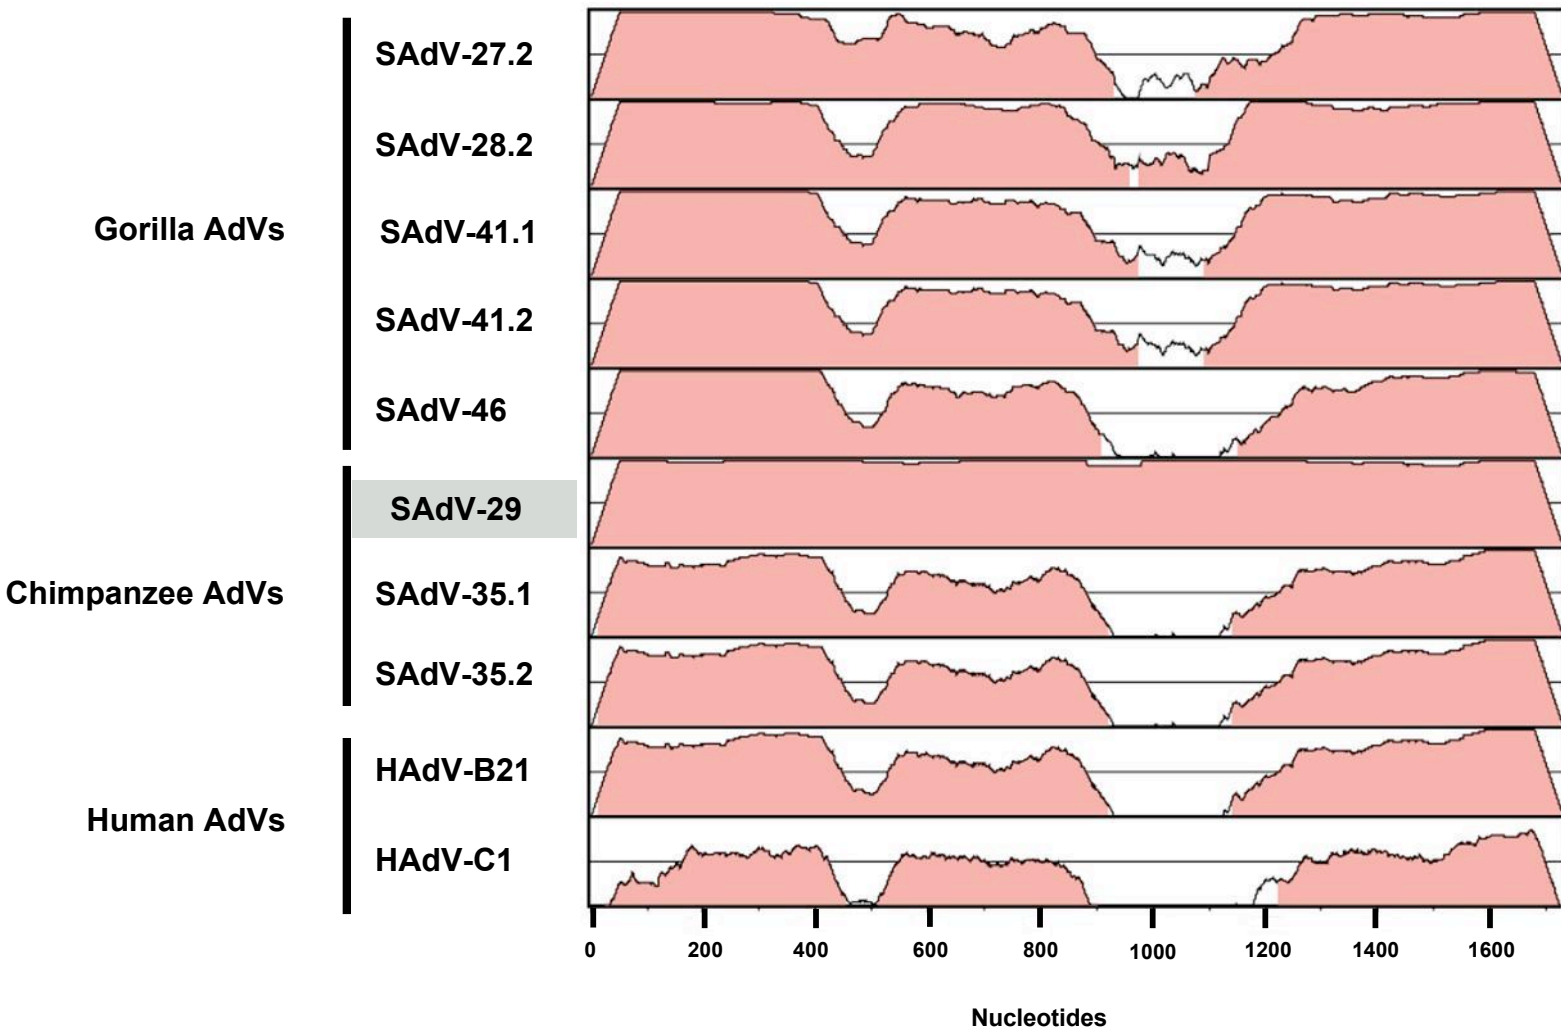

Supplement: MOESM4 [file 9609024]
